# Supplementary material for: Establishment of Tumor Treating Fields Combined With Mild Hyperthermia as Novel Supporting Therapy for Pancreatic Cancer
Source: PubMed Central journal article supplement (PMC8597267; doi:10.3389/fonc.2021.738801), 2021-11-03

Crude Western blot films corresponding to Fig. 6C

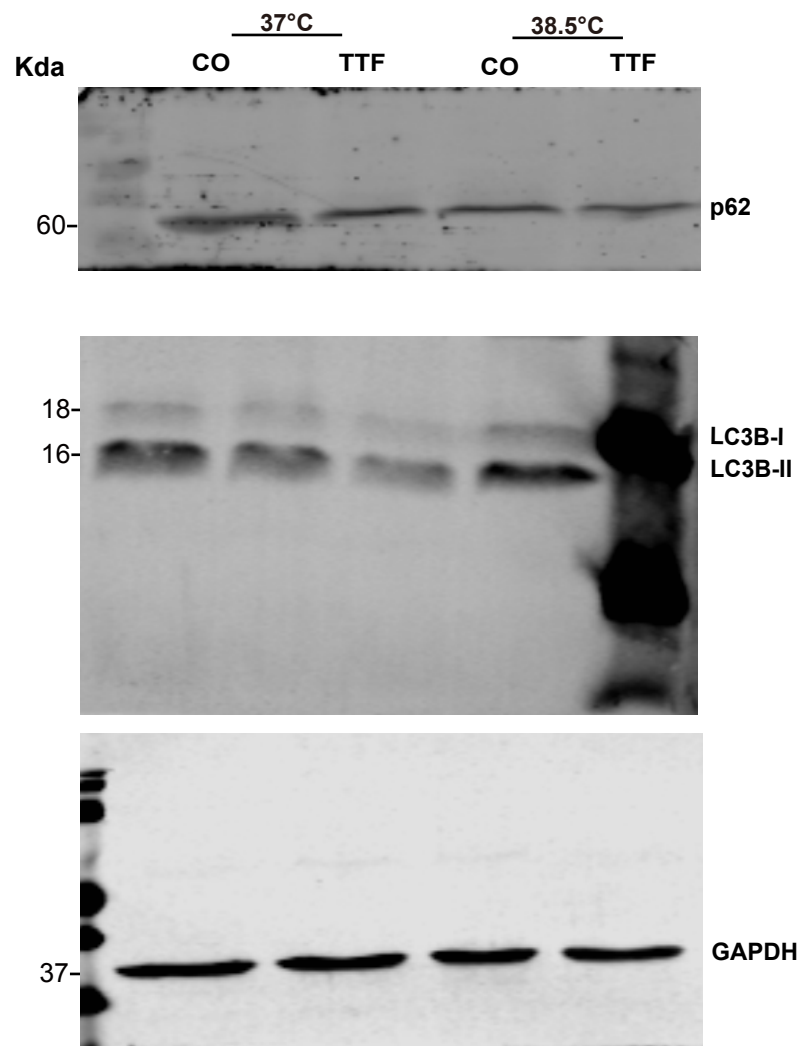

Supplement: DataSheet_1.pdf [file DataSheet_1.pdf]
